# A multiple ion-uptake phenotyping platform reveals shared mechanisms that affect nutrient uptake by maize roots

Marcus Griffiths<sup>a</sup>, Sonali Roy<sup>a</sup>, Haichao Guo<sup>a</sup>, Anand Seethepalli<sup>a</sup>, David Huhman<sup>a</sup>, Yaxin Ge<sup>a</sup>, Robert E. Sharp<sup>b</sup>, Felix B. Fritsch<sup>b</sup>, and Larry M. York<sup>a,1</sup>

<sup>a</sup>Noble Research Institute, LLC, 2510 Sam Noble Parkway, Ardmore, OK 73401, USA; <sup>b</sup>Division of Plant Sciences and Interdisciplinary Plant Group, University of Missouri, Columbia, MO 65211, USA

This manuscript was compiled on June 15, 2020

**Nutrient uptake is critical for crop growth and determined by root foraging in soil. Growth and branching of roots lead to effective root placement to acquire nutrients, but relatively less is known about absorption of nutrients at the root surface from the soil solution. This knowledge gap could be alleviated by understanding sources of genetic variation for short-term nutrient uptake on a root length basis. A new modular platform for high-throughput phenotyping of multiple ion uptake kinetics was designed to determine nutrient uptake rates in *Zea mays*. Using this system, uptake rates were characterized for the crop macronutrients nitrate, ammonium, potassium, phosphate and sulfate among the Nested Association Mapping (NAM) population founder lines. The data revealed that substantial genetic variation exists for multiple ion uptake rates in maize. Interestingly, specific nutrient uptake rates (nutrient uptake rate per length of root) were found to be both heritable and distinct from total uptake and plant size. The specific uptake rates of each nutrient were positively correlated with one another and with specific root respiration (root respiration rate per length of root), indicating that uptake is governed by shared mechanisms. We selected maize lines with high and low specific uptake rates and performed an RNA-seq analysis, which identified key regulatory components involved in nutrient uptake. The high-throughput multiple ion uptake kinetics pipeline will help further our understanding of nutrient uptake, parameterize holistic plant models, and identify breeding targets for crops with more efficient nutrient acquisition.**

nutrient uptake | root phenotyping | root respiration | RNA-seq | maize

**F**or plant growth and development, availability of the macronutrients including nitrogen (N), phosphorus (P), potassium (K) and sulfur (S) is critical. The availability of these macronutrients as ions in soil is often at limiting quantities for optimal plant growth (1, 2). In agriculture, chemical fertilizers are widely used to enrich soils and enhance crop productivity, but their usage adds a significant cost to production. Moreover, fertilizer use in agriculture is neither economically nor environmentally sustainable, with as little as 10-30% of applied fertilizer being captured by crop roots, and the remainder lost through leaching, erosion and as atmospheric emissions (3, 4). Understanding the genetic potential of plants for nutrient acquisition is important for developing nutrient-efficient crops (5, 6).

For a plant to acquire nutrients, the root system must perceive, grow to and intercept nutrients from the soil environment. Nutrient acquisition efficiency is defined as the amount of nutrient absorbed on a root cost basis (7, 8). There are two main processes that constitute nutrient acquisition

efficiency: (1) root exploration for nutrients with modification of root growth and root system architecture, and (2) nutrient exploitation capacity of roots for taking up local nutrients (7, 9). In recent years, advances in root imaging and deep learning analysis approaches have shown great promise for root exploration trait-based crop selection (10–15). Multi-scale research linking environmental nutrient availability across time of plant development will be required to understand the functional processes and mechanisms plants employ for nutrient acquisition. Dissection of these complex interactions will provide new opportunities to improve sustainable crop production with more nutrient-efficient cultivars.

Nutrients are spatially and temporally heterogeneous in the soil and, therefore, plants have evolved to have high and low affinity transporters for uptake across nutrient concentration gradients (16–21). Ion-uptake kinetics studies have been instrumental in uncovering these distinct uptake systems in roots across many nutrients and plant species (22–24). Ion uptake kinetics research to date has demonstrated that species level variation exists for nutrient uptake rates on a per root basis (referred to as specific nutrient uptake rate) (25), with a few examples of genotypic variation within the same species (26–28). However, the research field is critically understudied as most phenotyping efforts rely on isotope accumulation, which is a

## Significance Statement

Nutrient uptake is among the most limiting factors for plant growth and yet has not been used as a selection criterion in breeding. This is partly due to the lack of high-throughput phenotyping methods for measuring nutrient uptake. Here we describe a novel high-throughput phenotyping pipeline for quantification of multiple ion uptake rates. Using this new phenotyping system, our results demonstrate that specific ion uptake performance by maize plants is positively correlated among the macronutrients nitrogen, phosphorus, potassium and sulfur, and that substantial variation exists within a genetically diverse population. The findings reveal components of regulatory pathways possibly related with enhanced uptake, and confirm that nutrient uptake itself is a potential target for breeding of nutrient-efficient crops.

LMY, FBF, RES and MG conceived the research; MG and LMY developed the method; MG, HG, AS and YG assisted with the experimentation; MG, SR, AS and DH analyzed the data; and all authors contributed to the writing of the paper.

The authors declare no conflict of interest.

<sup>1</sup>To whom correspondence should be addressed. E-mail: [lmryork@noble.org](mailto:lmryork@noble.org)

low-throughput and destructive means of measuring uptake rates and ignores the interplay between nutrients (24, 29–31). Most studies focus on uptake measures of a single nutrient from simple solutions, however there are some examples of multiple nutrients from more complete solutions (26, 32). While total shoot nutrient content is sometimes assumed to be a proxy for root uptake capacity, so many factors influence overall plant growth and root exploration that nutrient content may be an unreliable indicator of specific uptake rate by roots (reviewed in (25)). Maximizing uptake kinetics is generally assumed to be beneficial for plant growth, however the energetic costs are likely substantial and therefore uniting the studies of uptake and metabolic cost is needed.

Here, we describe a modular phenotyping pipeline called ‘*RhizoFlux*’ for high-throughput phenotyping of multiple ion uptake kinetics in plants. Using this platform, we simultaneously quantified specific nutrient uptake rates (nutrient uptake rate per length of root) of nitrate, ammonium, phosphate, potassium and sulfate for each of the Nested Association Mapping (NAM) population founder lines in maize. We found that specific nutrient uptake rates were distinct from total uptake and plant size traits as an uptake efficiency related trait. In addition, we found that the specific nutrient uptake rates for each macronutrient were positively associated with one another, with notable genotypic preference for particular ions, and that specific root respiration rate (root respiration rate per length of root) was a significant contributor to specific nutrient uptake rate performance. All macronutrient specific uptake rates were highly heritable and, therefore, could be utilized as breeding targets for improved crop nutrient uptake.

## Results

**Development of a high-throughput multiple ion uptake kinetics pipeline.** A plant phenotyping pipeline, *RhizoFlux*, was designed to phenotype in high-throughput multiple ion uptake performance for the macronutrients N, P, K and S simultaneously. To achieve this, a custom hydroponic growth and uptake experimental setup was designed and coupled with a data analysis workflow using R scripts (Fig. 1).

To attain the experimental throughput and reproducibility necessary for mapping population-sized studies on plant nutrient uptake, two separate systems were designed, one for plant growth and one for uptake measures. Maize seeds were germinated, and seedlings grown together in large hydroponic tanks (Fig. 1A–D) and then transferred to individual hydroponic chambers for nutrient uptake phenotyping (Fig. 1E). This enabled the uptake measurements to be scaled up to greater numbers of lines with a time-staggered experimental block design. For measurement of multiple macronutrient uptake rates simultaneously, a basal nutrient solution was developed where the concentrations of calcium and 2-(N-morpholino)ethanesulfonic acid (MES) buffer were kept consistent to minimize pH fluctuation and preserve root membrane potential. For testing high and low ion uptake performance, defined concentrations of N, P, K and S were added to the basal solution (see Materials and Methods). Plants were then transferred to individual hydroponic chambers containing the nutrient solution, and the solution was sampled over time using a coupled 24-channel peristaltic pump. The net nutrient uptake rate was determined from the depletion of the nutrient from the chamber over time. The nutrient solution samples

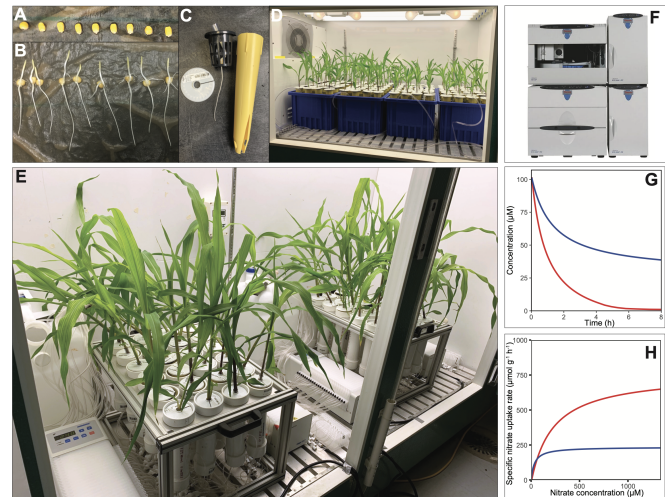

**Fig. 1.** *RhizoFlux* platform for phenotyping of multiple ion uptake kinetics in plants. (A) Maize seeds are surface sterilized and germinated on germination paper rolls. (B) Evenly germinated seedlings are transferred to (C) seedling cones and grown in (D) aerated hydroponics for 14 days. (E) Plants are transferred to a custom ion uptake setup consisting of 24 hydroponic chambers connected to two 24-channel peristaltic pumps for simultaneous solution loading, aeration, and sampling onto a collection plate. (F) Ion concentrations of collected nutrient samples are determined using ion chromatography (G) for quantifying ion depletion across time and (H) used to calculate net specific ion uptake rates on a root length or mass basis.

were collected in a collection plate and the ion concentrations were quantified using ion chromatography (Fig. 1F). The downstream data analysis for calculating specific nutrient uptake rates was automated using R scripts (Fig. 1G and H) (<https://doi.org/10.5281/zenodo.3893945>).

The multiple ion uptake pipeline was used to determine 35 uptake parameters for each plant (described in Table S1). Including all plant traits measured, a total of 50 traits were collected for each plant. These traits were used to determine the nutrient uptake capabilities of each plant in terms of: (i) the total uptake performance of a plant, (ii) the specific ion uptake rate on a root length or mass basis, and (iii) the ion uptake ratio and stoichiometry of the plant. The pipeline is modular and flexible for adoption with different plant species by changing vessel volumes, nutrient concentrations, and experiment designs. The phenotyping platform enables exploration of a broad range of questions, including studies of competitive and facilitative interactions between nutrients, influence of abiotic and biotic factors on nutrient uptake, and the use of mutants for genetic confirmation of nutrient uptake properties.

**Genetic diversity exists among NAM population founder lines for specific nutrient uptake rates and is highly heritable.** Using the multiple ion uptake phenotyping pipeline, specific nutrient uptake rates of nitrate, ammonium, phosphate, potassium, and sulfate were characterized simultaneously for the 25 maize NAM population founder lines and the reference line B73. After growth in a common nutrient solution, each line was deprived of the focal macronutrients for 48 hours, and then transferred to the uptake setup. Nutrient uptake performance was characterized in a high and a low multiple ion solution with a 10-fold macronutrient concentration difference to characterize high and low affinity performance (23, 33, 34).

We found that genetic diversity exists among the NAM population founders for specific nutrient uptake rates (on a root

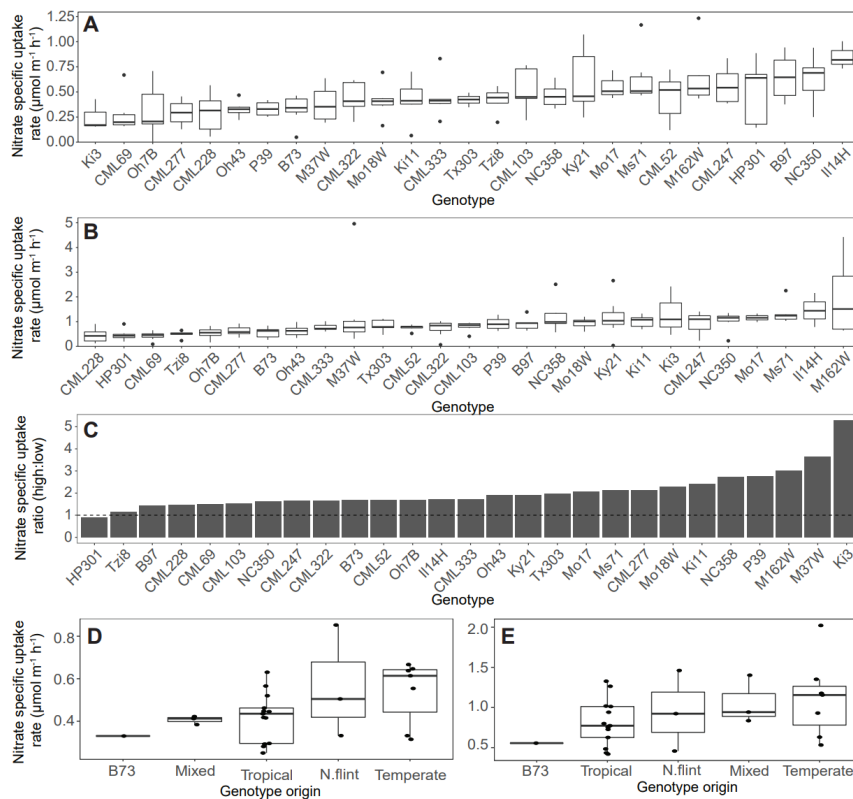

**Fig. 2.** Genetic diversity among NAM population founder lines for specific nitrate uptake rates from solution concentrations of (A) 100  $\mu\text{M}$  and (B) 1 mM ( $P < 0.001$ ). (C) The net specific nitrate uptake rate ratio between the solutions, with a ratio greater than 1 representing a greater uptake rate in the high concentration compared to the low concentration. The specific nitrate uptake rates by broad group classification in the solution concentrations of (D) 100  $\mu\text{M}$  and (E) 1 mM. Figures for phosphate, potassium, sulfate and ammonium are available in Fig. S1.

length basis), with significant genotypic differences for nitrate (138  $P < 0.001$ , Fig. 2A and B, Table S2) as well as for phosphate, 139 potassium, sulfate and ammonium ( $P < 0.01$ , Fig. S1, Table 140 S2). Line M162W had the greatest specific nitrate uptake rate 141 in the high concentration solution and second highest in the 142 low concentration solution, with 4.81 and 2.37 times that of the 143 lowest line CML69, respectively (Fig. 2A and B). Furthermore, 144 significant effects of genotype  $\times$  concentration were detected 145 for nitrate and sulfate ( $P < 0.05$ , Table S2). The founders 146 showed differential nitrate uptake rate capacity between the 147 concentration solutions, with the greatest difference observed 148 for line Ki3, which exhibited a specific uptake rate in the 149 high concentration that was 5.29 times higher than in the low 150 concentration. Line HP301 appeared to have a near maximum 151 specific uptake rate ( $I_{\text{max}}$ ) in the low concentration as its 152 ratio of uptake between the two nutrient concentrations was 1.1, 153 highlighting the broad environmental acclimation of the 154 population (Fig. 2C). 155

The specific nutrient uptake rates for each macronutrient 156 were found to be highly heritable with a broad-sense heritability 157 between 0.37 and 0.88 (Fig. S2). Therefore, the traits 158 assessed by this pipeline may serve as novel breeding targets 159 with genetic variation that could be harnessed for breeding 160 crops better able to acquire soil nutrients. Based on broad 161 group classification of the NAM population founders by pheno- 162 logic and breeding background, the specific nutrient uptake 163 rates were compared (Fig. 3D and E) (35). Uptake per- 164 formance in both high and low concentration solutions were 165 found to not be significantly different among broad classifica- 166 tion groups ( $P = \text{ns}$ ) and, therefore, specific nutrient uptake 167 rate has greater variation by line rather than origin. 168

To determine if specific nutrient uptake rate in a plant is 169

relative to a particular nutrient concentration, or consistent 170 across a wide concentration range, a regression between the 171 specific nutrient uptake rates by concentration was made. 172 A positive significant relationship was observed between the 173 concentration levels for specific nutrient uptake rates of nitrate 174 ( $P < 0.05$ , Fig. S3), with a non-significant trend for sulfate ( $P = 175 0.08$ , Fig. S3). For phosphorus, potassium and ammonium, 176 however, no significant relationship was found between specific 177 uptake rates in the two concentrations ( $P = \text{ns}$ , Fig. S3). 178 Therefore, measurements in a single nutrient concentration 179 representative of dominant field conditions at the respective 180 growth stage may have predictive power for crop selection. 181 Wide genotypic variation in specific nutrient uptake rate was 182 observed within each nutrient, representing value for screening 183 lines at multiple nutrient concentrations for more detailed 184 characterization when possible. 185

### Specific nutrient uptake rates among multiple macronutrients 186 are correlated and are a distinct efficiency breeding target. 187

The overall interactions among plant traits were determined 188 using the genetically diverse NAM population founder dataset. 189 A principal component analysis (PCA) for all 50 uptake and 190 plant was conducted, which showed that the first two PCs 191 accounted for more than half (62.3%) of the total variance. 192 The PCA ordination revealed a distinct separation between 193 the specific nutrient uptake and root respiration rates from 194 the total uptake and plant size measures (Fig. 3A). This 195 trait separation indicates independent genetic control and, 196 therefore, distinct breeding targets. As specific nutrient uptake 197 and respiration rate traits are independent of plant size, the 198 ratio of these two traits could be considered as an index of 199 efficiency. 200

A correlation matrix of the specific nutrient uptake rate 201



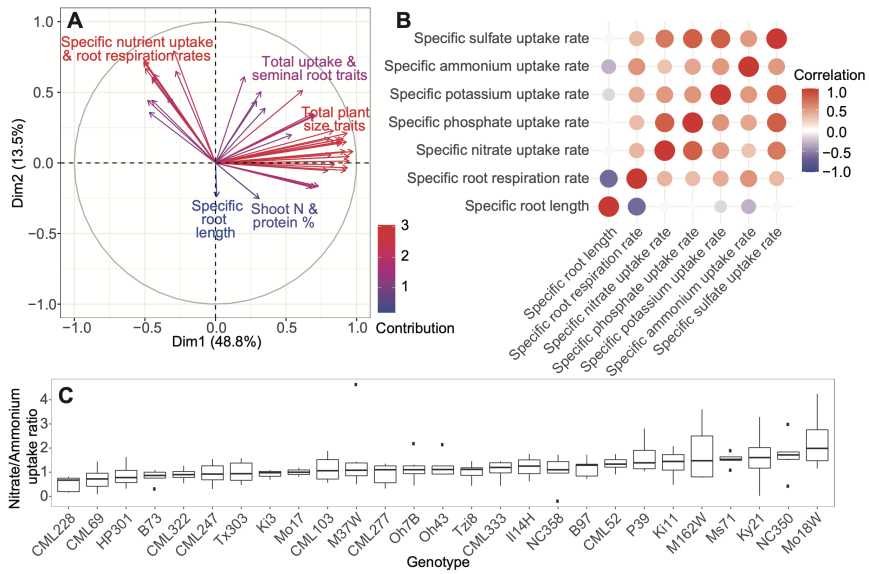

**Fig. 3.** (A) PCA ordination of extracted plant traits of the NAM population founder lines in the high concentration solution. Arrows indicate directions of loadings for each trait and are color coded by contribution to the percent variation of the component. (B) Correlation matrix for specific root nutrient uptake, respiration and length parameters in the high concentration solution. Correlations are color coded from strong positive correlation in red to strong negative correlation in blue with no correlation shown in white. (C) The net uptake rate ratio between nitrate and ammonium in the 1 mM high concentration solution ( $P < 0.001$ ). A ratio above 1 represents a higher proportion of ammonium uptake compared to nitrate. ANOVA results for all nutrient combinations are shown in Table S2.

202 data revealed positive correlations among nutrient types (correlation range 0.29 – 0.80,  $P < 0.001$ , Fig. 3B). In the high concentration, the correlations between nitrate:phosphate, sulfate:phosphate, and sulfate:potassium were the highest with each having correlation scores of 0.80. The correlation scores between the specific nutrient uptake rates in the low concentrations were generally lower than in the high concentrations (0.11 – 0.69,  $P < 0.01$ ) and with no significant correlations between nitrate:ammonium, potassium:ammonium, and sulfate:ammonium ( $P = ns$ ). The exceptions were nitrate:potassium and ammonium:phosphate, which had higher correlations in the low than the high concentration (0.68 and 0.51, respectively,  $P < 0.001$ , Fig. S4). The positive correlations among specific macronutrient uptake rates represent shared underlying mechanisms of regulation for uptake.

207 Interestingly, despite the overall trend of positive correlation among specific nutrient uptake rates, we observed that there is also genotypic variation in nutrient stoichiometry. Uptake ratios between nutrients were unequal amongst the lines, with preferences exhibited for particular nutrient combinations (Fig. 3C). Significant genotypic differences in specific nutrient uptake rate ratios were observed between the nitrogen forms nitrate and ammonium ( $P < 0.01$ , (Fig. 3C), and phosphate and potassium ( $P < 0.01$ , Fig. S5). The line with the greatest preference for ammonium over nitrate was Ms71, having 2.61 times higher specific uptake rate of ammonium compared to nitrate. In contrast, CML228 had a nitrate preference over ammonium with a specific nutrient uptake rate ratio of 0.03. Therefore, genotype selection tailored to a particular soil nutrient composition and management strategy has the potential to improve uptake efficiency and yield.

233 **Maize lines with greater low affinity specific nitrate uptake have higher specific root respiration to facilitate active transport.** To examine the metabolic costs associated with nutrient uptake, we measured the specific root respiration rates for each of the NAM population founder lines immediately after the uptake experiment. The specific nitrate, potassium and sulfate uptake rates were found to have a significant positive correlation with specific root respiration in the high concen-

241 tration solution only ( $R = 0.12, 0.16, 0.15, P < 0.001$ , Fig. 4A and B), Fig. S6). That the correlation between specific nutrient uptake rate and respiration rate was only observed in the high concentration indicates that high root respiration itself is not causative of increased uptake ( $P = ns$ , Fig. 4A and B). When exposed to the high concentration an average increase of 27% in specific root respiration rate was observed across all lines. Lines with a greater uptake capacity likely respired more to facilitate the active transport of nutrients for a higher specific uptake rate (Fig. 4B). For phosphate and ammonium, positive correlations between specific root respiration rates and specific nutrient uptake rates were observed in both nutrient concentration solutions ( $R = 0.16, 0.24, P < 0.001$ , Fig. S6). These results indicate that increased respiration may be a cost of increased uptake, but that simultaneously selecting for higher uptake but lower respiration may be possible.

257 **Lines with high specific nutrient uptake rate have elevated transcript abundance of nutrient responsive genes and metabolism.** To elucidate the pathways and differences between lines with high and low specific macronutrient uptake rates at the molecular level, a comparative transcriptomic analysis was conducted. Two lines with high specific uptake rates (M162W and Ky21), three lines with low specific uptake rates (CML69, CML227 and CML228) and the reference line B73, which showed an intermediate specific uptake rate in both low and high concentration solutions, were selected for RNA-seq (Fig. 5A and B). The phenotyping experiment described above and most experiments in the literature include a deprivation step generally believed to increase uptake rates by priming the molecular machinery. To understand short-term transcriptomic responses specific to the high nutrient uptake rate lines, maize seedlings were grown in full nutrient conditions for 12 days and then one half of the seedlings were macronutrient deprived for 48 hours, which was the same procedure used for the phenotyping experiment. We hypothesized that both NAM lines with high specific nutrient uptake rates (Ky21 and M162W) under nutrient deprived conditions utilized a conserved set of pathways and genes to mediate elevated nutrient uptake that were reduced or missing in NAM lines which were

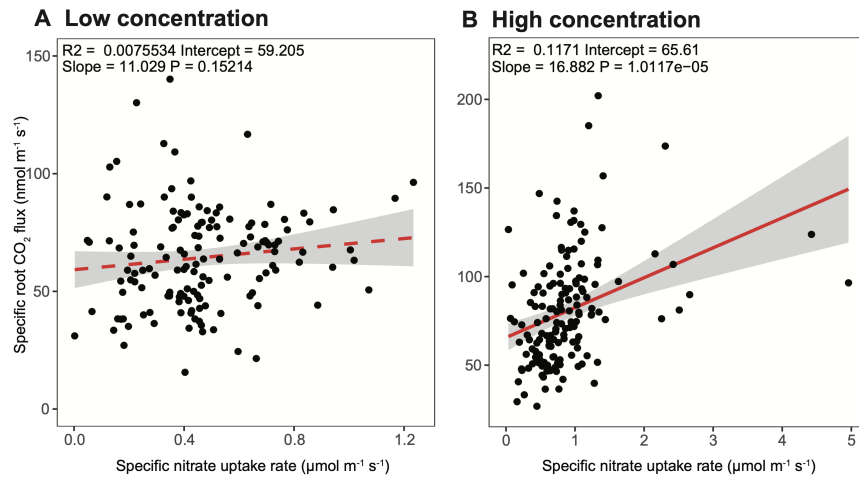

**Fig. 4.** Linear regression analyses for the NAM population founder lines between specific nitrate uptake rate and specific root respiration rate in the (A) low (100  $\mu$ M) and (B) high (1 mM) concentration solutions. Significant relationships are depicted with a full red line and non-significant relationships with a dashed red line. The grey bar represents a 95% confidence region.

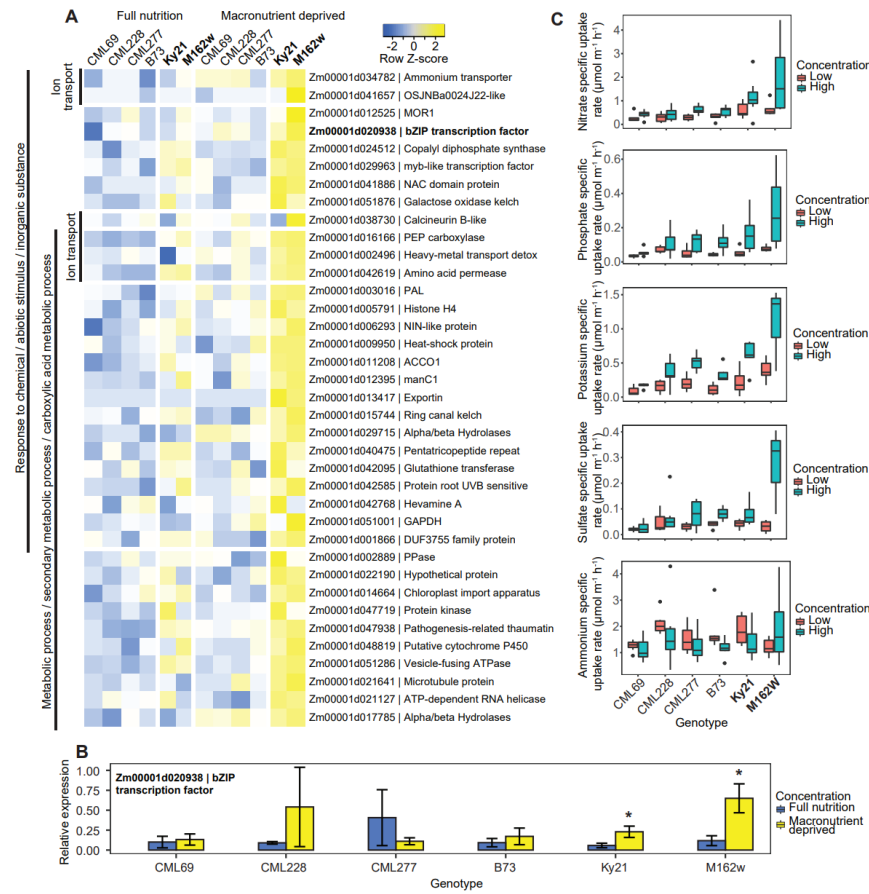

**Fig. 5.** Maize founder lines showing differences in root gene expression across full nutrient and nutrient deprived plants. (A) Heatmap showing selected genes induced during full nutrient and nutrient deprived conditions with fold-changes of  $\pm 1$  ( $P < 0.06$ ). Z-score represents the number of standard deviations of a condition from the mean of all conditions. (B) qPCR validation results of candidate bZIP transcription factor across full nutrient and deprived plants ( $P < 0.05$ ). (C) Specific nutrient uptake rates of selected lines used in RNA-seq by nutrient solution concentration.

unable to do so (CML69, CML227, CML228 and B73).

In our transcriptional profiling, the dataset was analyzed to specifically identify responses in common among high specific nutrient uptake rate lines but absent across all other lines under both full and deprived conditions. A subset of 50 genes that were significantly upregulated and 182 genes that were downregulated by at least  $\pm 1$  log fold-change ( $P < 0.06$ ) were selected by comparing the gene expression of high specific nutrient uptake lines in low nutrient conditions with the expression of genes in all other samples (Fig. 5A, Data S1). Gene Ontology (GO) enrichment analyses revealed a significant activity of metabolism related genes (GO:0044710, 64%), corroborating the higher root respiration rates seen in these lines (Fig. 5A, Data S2). A second major GO enrichment category was response to chemical / abiotic stimulus / inorganic substance (GO:0042221, 47% / GO:0009628, 34% / GO:0010035, 26%), supporting the enhanced nutrient deprivation response in the high specific uptake rate lines.

Compared to B73 and the low specific nutrient uptake rate lines, genes encoding a number of nutrient transporters were found in the high specific nutrient uptake rate lines (Fig. 5A, Data S1). These included an ammonium transporter (Zm00001d034782) and the NIN-like protein transcription factor (Zm00001d006293), supporting our observations of higher uptake of these nutrients in these lines. This transcription factor was recently shown to be a central regulator of nutrient-signalling networks (36). These findings validate our discovery platform and analyses by selecting candidate lines based on specific nutrient uptake rate performance. Our data suggest that this transcription factor traditionally thought to mediate nitrate uptake and metabolism might be involved in fundamental multiple-nutrient uptake or metabolism processes. Further functional studies are warranted to confirm this hypothesis.

Finally, we found a number of novel targets that, with further investigation, may turn out to be useful to improve nutrient uptake performance. One of the novel genes validated with qPCR was Zm00001d020938, a bZIP transcription factor family protein that was induced during nutrient deprivation in the high nutrient uptake rate lines only ( $P < 0.05$ , Fig. 5B). The transcription factor is likely a regulator of downstream signalling cascades mediating higher nutrient uptake or metabolism (Fig. 5A, Data S2). These gene candidates could potentially provide breeding targets for maize lines with greater nutrient uptake efficiency.

## Discussion

With the wide adoption of image-based root phenotyping in recent years, significant advances in characterizing root system architecture have been made (37, 38). However, understanding of functional root processes including nutrient uptake lags behind, with significant knowledge gaps remaining about the genetic, physical, and molecular mechanisms involved. Development and adoption of phenotyping approaches for uptake kinetics scaled to mapping populations could accelerate this discovery (reviewed by (25)).

Our approach addresses this challenging bottleneck with the development of a modular pipeline for reproducible high-throughput phenotyping of multiple ion uptake by roots. In maize, we revealed that specific nutrient uptake rate (nutrient uptake rate per length of root) is an uptake efficiency trait in respect to root construction costs that is distinct from total

plant uptake and plant size traits (Fig. 6A and B). Specific ion uptake rates for several macronutrients were found to be highly heritable and variable among the genetically diverse NAM population founder lines. Harnessing this natural variation through identification of underlying genes and mechanisms is of paramount importance to improving nutrient uptake efficiency in crops. Work in maize indicated variation in uptake kinetics even among root classes such as seminal, nodal, and lateral roots, which implies that regulation of transporters and other molecular machinery leads to substantial differences in uptake (39). Allelic variation of a nitrate transporter affecting specific uptake rate in rice demonstrates that a single allele can significantly affect plant resource acquisition (40). Recently, mining natural sequences for more effective RuBisCO alleles led to discovery of variants with six-fold faster reactions than typical plant variants (41), and similar strategies could be used for nutrient uptake. Breeding efforts for yield may have indirectly selected for increased specific nitrogen uptake rate in modern wheat varieties (42) and, therefore, crop selection for specific ion uptake rate directly could possibly accelerate gains in nutrient uptake efficiency and yield.

The multiple ion phenotyping approach allowed investigation of the interaction between nutrients in plant uptake. We uncovered that specific ion uptake rates are positively correlated among the macronutrients N, P, K, and S and, therefore, are likely governed by shared mechanisms (Fig. 6C). Only a few studies have measured the uptake rates of more than one nutrient, and even more rarely investigated in the context of discovering shared mechanisms through correlative analysis across lines (26, 32). Nutrient transporters have been shown to exhibit cross-regulation with multiple nutrients at the local and whole plant levels as well as to facilitate uptake of phytohormones (43, 44). Our RNA-seq analyses identified central regulators of nutrient-signaling networks that have elevated transcript abundance in the high specific nutrient uptake lines.

With the current push towards multi-dimensional phenomics (45–47), conducting nutrient uptake experiments in representative conditions is important to assess the complexity of interplay between nutrients. Adding to this complexity, we also found significant variation in preference for specific nutrients in particular nutrient combinations among the NAM population founder lines (Fig. 6D). This illustrates the importance of characterizing cultivars to ensure that they are adapted to the soil environment and fertilizer regimes according to nutrient uptake characteristics. Dissection of these mechanisms is important to understand the fundamental processes by which all plants forage nutrients from their environment. This study used a hydroponics approach as it has inherent practical advantages over soil in controlling nutrient availability and measurements of uptake rates. It will be important to extend this research to determine how soil physical and chemical properties affect multiple nutrient uptake rates and nutrient preferences. Optimization of above- and below-ground plant traits to the environment and management practices will be integral to improving nutrient uptake and reducing fertilizer losses.

Nutrient uptake is a substantial carbon expense to the plant and, therefore, understanding how nutrient uptake affects overall plant efficiencies is vital. We phenotyped the specific root respiration rates amongst the NAM population founder lines as a measure of root activity and metabolic cost.



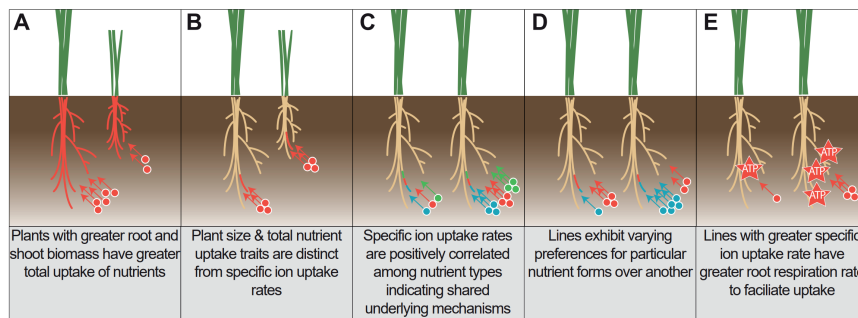

**Fig. 6.** Mechanisms of uptake performance with regards to plant size, specific uptake rates, uptake of different nutrients, and respiration. Root colors represent the area of root nutrient uptake per nutrient type. Circle colors represent different nutrient types.

401 The results revealed that specific nutrient uptake rates were  
 402 positively correlated with specific root respiration rate in the  
 403 high nutrient concentration solutions (Fig. 6E). As specific  
 404 root respiration rate was not correlated in the low concentra-  
 405 tion solution for nitrate, potassium and sulfate, the metabolic  
 406 cost appears to be associated with low affinity transport of  
 407 these nutrients. Potentially, respiration is linked to uptake  
 408 capacity by co-regulation of associated genes and the need of  
 409 ATPase and other pumps to form necessary ionic gradients.  
 410 The large variation observed in the NAM population founder  
 411 lines for specific nutrient uptake rate likely represents the di-  
 412 verse environments to which they are adapted. Our RNA-seq  
 413 data revealed a significant enrichment of metabolism-related  
 414 genes in the high specific nutrient uptake lines, which may  
 415 corroborate the enhanced nutrient uptake rates observed. The  
 416 positive relationship between uptake and respiration raises  
 417 an interesting dilemma. On the one hand, maximizing uptake  
 418 should generally be beneficial (25), while on the other,  
 419 minimizing metabolic burden of the root system has been  
 420 proposed to be a promising opportunity (48). The *SimRoot*  
 421 simulation model generally indicated that increasing uptake  
 422 rates was beneficial, but since no cost is included in the model  
 423 the optimum uptake rate may actually be slower (39). Includ-  
 424 ing accurate costs in such simulations will greatly facilitate  
 425 efforts to design ideal integrated phenotypes. One way to  
 426 attain reduced root respiration is with a greater percent of  
 427 root cortical senescence, although this was found to also lower  
 428 N and P uptake (49) and other anatomical traits may have  
 429 similar influences. Therefore, we propose that measuring both  
 430 uptake and respiration rates is necessary in order to ensure  
 431 co-optimization.

432 Our results highlight the importance of nutrient interplay  
 433 and that representative nutrient uptake assays should be in the  
 434 presence of other nutrients as is the case in soil. The multiple  
 435 ion uptake platform, ‘*RhizoFlux*’, enables high-throughput and  
 436 precise phenotyping, which will provide mechanistic insights  
 437 into nutrient uptake and has a great potential for genomic  
 438 selection that will benefit agriculture. The results revealed  
 439 that specific ion uptake rates are highly heritable and, there-  
 440 fore, we envision that breeding for targeted environments by  
 441 combining above- and below-ground plant traits to form inte-  
 442 grated phenotypes will likely improve plant performance and  
 443 yield whilst reducing fertilizer losses.

## 444 Materials and Methods

445 Material dimensions are given in the units supplied by the manu-  
 446 facturer.

447 **Plant materials.** Seed for the maize Nested Association Mapping  
 448 (NAM) population founder lines and reference line B73 were ob-  
 449 tained from Dr. Felix Fritschi (University of Missouri, originally  
 450 sourced from Dr. Sherry Flint-Garcia, USDA-ARS). The founder  
 451 lines were originally selected to maximize diversity from a larger  
 452 panel of diverse maize inbreds, and each has a recombinant inbred  
 453 population crossed with the common reference parent B73.

454 **Experimental design and growth conditions.** The experiment was a  
 455 complete randomised block design replicated seven times over time  
 456 as independent runs. Two lines had poor germination that reduced  
 457 their sample number, Mo17 (two replicates high and three replicates  
 458 low) and Ki3 (three replicates each). Seeds were surface sterilized  
 459 with 5% bleach and washed three times with double deionized water  
 460 (ddH<sub>2</sub>O). Sterilized seeds were transferred to germination paper rolls  
 461 soaked with 0.2 mM CaSO<sub>4</sub>, and then allowed to germinate at 28 °C  
 462 for four days in the dark (Fig. 1A). Uniformly germinated seedlings  
 463 were transferred to individual plastic mesh plant baskets (1.5” ×  
 464 2”, Shenzhen Skywalker Electronic Limited, Shenzhen, China) that  
 465 were placed into plant cone-tainers (SC10 Super RL98 cell, Stuewe  
 466 Sons Inc., OR, USA). A slot about 3 mm wide was cut from the  
 467 bottom of the cone to about 5 cm from the top in order to accommo-  
 468 date the tubing from the sampling platform described below. The  
 469 plants in cones were placed in aerated hydroponic tanks fitted with  
 470 custom acrylic lids with 24 equally spaced holes of 1.75” diameter  
 471 such that the cones were held vertically (Dividable Grid Container  
 472 10.88” × 16.5” × 8”, Quantum Storage Systems, FL, USA; EcoPlus  
 473 commercial air pump, Hawthorne Gardening Company, WA, USA)  
 474 (Fig. 1B–D). The nutrient solution used was a modified ½-strength  
 475 Hoagland’s solution composed of (in μM) 500 KH<sub>2</sub>PO<sub>4</sub>, 5700 KNO<sub>3</sub>,  
 476 300 NH<sub>4</sub>NO<sub>3</sub>, 2000 CaCl<sub>2</sub>, 1000 MgSO<sub>4</sub>, 46 H<sub>3</sub>BO<sub>3</sub>, 7 ZnSO<sub>4</sub> · 7H<sub>2</sub>O,  
 477 9 MnCl<sub>2</sub> · 4H<sub>2</sub>O, 0.32 CuSO<sub>4</sub> · 5H<sub>2</sub>O, 0.114 (NH<sub>4</sub>)<sub>6</sub>Mo<sub>7</sub>O<sub>24</sub> · 4H<sub>2</sub>O,  
 478 and 150 Fe(III)–EDTA(C<sub>10</sub>H<sub>12</sub>N<sub>2</sub>NaFeO<sub>8</sub>). Additional Fe(III)-  
 479 EDTA was added every three days and the solution was adjusted  
 480 to pH6 using chHCl. Plants were grown in a growth chamber  
 481 with a day-night cycle of 16/8 h at 28/20°C at a photon flux  
 482 density of 400 μmol<sup>-2</sup> s<sup>-1</sup> at canopy height for 12 days (E7/2  
 483 growth chamber, Conviron, Winnipeg, Canada). The plants were  
 484 then transferred to a largely macronutrient-free nutrient solu-  
 485 tion composed of (in μM, (500 CaCl<sub>2</sub>, 46 H<sub>3</sub>BO<sub>3</sub>, 7 ZnSO<sub>4</sub> · 7H<sub>2</sub>O,  
 486 9 MnCl<sub>2</sub> · 4H<sub>2</sub>O, 0.32 CuSO<sub>4</sub> · 5H<sub>2</sub>O, 0.114 (NH<sub>4</sub>)<sub>6</sub>Mo<sub>7</sub>O<sub>24</sub> · 4H<sub>2</sub>O,  
 487 and 150 Fe(III)–EDTA(C<sub>10</sub>H<sub>12</sub>N<sub>2</sub>NaFeO<sub>8</sub>) for 48 h before measure-  
 488 ment of multiple ion uptake.

489 **Multiple ion uptake and trait measures.** For the ion uptake phenotyp-  
 490 ing assay a modular platform was developed with individual plant  
 491 hydroponic chamber control of nutrient solutions (Fig. 1E). A single  
 492 module consisted of 24 polyvinyl chloride (PVC) pipe chambers (1.5”  
 493 ID PVC Schedule 40 pipe and 1.5” hub cap fitting, Charlotte Pipe  
 494 and Foundry Company, NC, USA) with a volume capacity of 250  
 495 mL. The chambers were designed so each plant could remain in the  
 496 seedling cone for minimal disturbance to the roots during transfer.  
 497 Each chamber was connected to two 24-channel peristaltic pumps  
 498 (Ismatec ISM944A, Cole-Parmer Instrument Company LLC., IL,  
 499 USA) with tubing. One pump was used to fill the empty chambers  
 500 with nutrient solution and afterwards provided continuous aeration  
 501 by pumping air to the chambers (24 rotations per minute) via tub-  
 502 ing connected to the bottom of each chamber (3.17 mm ID tubing  
 503 Ismatec SC0222-LT 2-Stop 0; Masterflex SC0223-LT Tygon; Master-  
 504 flex Hose Barb Union 1/8”, Cole-Parmer Instrument Company LLC.,  
 504

505 IL, USA; CPC ID 1/8" hose barb PMCD1702 insert PMC2202,  
506 Colder Products Company, MN, USA). To fill with nutrient solution,  
507 the 24 tube inlets were placed into a common container full of the  
508 appropriate solution, the pump ran for a predetermined time to out-  
509 put the correct solution volume, and then the tubes were removed  
510 to pump air for aeration. The second pump was used for periodic  
511 sampling of the nutrient solution from the middle of the chamber  
512 into a 2 mL 96-well collection plate (0.51 mm ID tubing Ismatec  
513 SC0005-LT 2-Stop 0; Masterflex SC0029-LT Tygon, Cole-Parmer  
514 Instrument Company LLC., IL, USA; Diba MicroBarb® Adapter,  
515 1/4" to 0.02" ID Diba Industries Inc., CT, USA). The correct sample  
516 volume was achieved by running the pump for a predetermined time.  
517 After each nutrient sampling, the pumping direction was reversed to  
518 expel all solution back into the chamber and clear the tubing. The  
519 small diameter tube outlets were placed into a 96-well microplate  
520 cover (VWR International, LLC, PA, USA) with holes drilled in a  
521 pattern to match the 96-well collection plate. Two identical modules  
522 with a total of four pumps were used and placed in a large growth  
523 chamber with the same environmental conditions as detailed earlier  
524 (PGR15 growth chamber, Conviron, Winnipeg, Canada) with a  
525 throughput of 48 plants per experimental run.

526 For the NAM population founder lines, the ion uptake assay  
527 was used to phenotype multiple ion uptake kinetics under high  
528 and low macronutrient concentration solutions. The high concen-  
529 tration solution consisted of (in  $\mu\text{M}$ ) 1000  $\text{KNO}_3$ , 1000  $\text{NH}_4\text{Cl}$ ,  
530 125  $\text{Ca}(\text{H}_2\text{PO}_4)_2\text{H}_2\text{O}$ , 250  $\text{MgSO}_4$ , and 375  $\text{CaCl}_2$ . For the low concen-  
531 tration solution, the macronutrient concentrations were 10-fold  
532 lower than the high solution with (in  $\mu\text{M}$ ) 100  $\text{KNO}_3$ , 100  $\text{NH}_4\text{Cl}$ ,  
533 12.5  $\text{Ca}(\text{H}_2\text{PO}_4)_2\text{H}_2\text{O}$ , 25  $\text{MgSO}_4$  and 487.5  $\text{CaCl}_2$ . In both solu-  
534 tions, the calcium concentration was maintained at 0.5 mM and a  
535 1 mM MES buffer was used (pH 6). As noted above, plants were  
536 grown for 12 days in complete nutrient solution at relatively high  
537 concentrations, then underwent deprivation in a nutrient solution  
538 lacking macronutrients for 48 h. Based on preliminary work during  
539 development, a nutrient induction step was not used as no signif-  
540 icant effect on specific nutrient uptake rate was observed across  
541 nutrient concentration ranges (10  $\mu\text{M}$ -10 mM). The plants were  
542 transferred intact within their plastic cones into individual chambers  
543 in the phenotyping platform such that the slot in the cone fit over  
544 the inlet of the sampling tube. Once the first pump filled all 24  
545 chambers with the appropriate solution, all plants were transferred  
546 to the chambers with the plastic cones lowered into the chambers  
547 and submerging the roots. Two minutes after the macronutrient  
548 deprived plants were transferred to the individual chambers the  
549 first 1.5 mL nutrient sample was collected for time zero. Nutrient  
550 solution samples were then taken at 0.5, 1, 2, 3, 4, 6 and 8 h.

551 The ion concentrations of the collected nutrient samples were de-  
552 termined using a Thermo Scientific ICS-5000+ ion chromatographic  
553 system (Thermo Fisher Scientific, MA, USA). Chromatographic  
554 separation was achieved using a Dionex IonPac CS12A ( $2 \times 250$   
555 mm) analytical column with a AG12A ( $2 \times 50$  mm) guard column  
556 for cations, and a Dionex IonPac AS11HC-4 m ( $2 \times 250$  mm) ana-  
557 lytical column with a AG11HC-4 m ( $2 \times 50$  mm) guard column for  
558 anions. Ions were eluted using gradient elution at a flow rate of 0.3  
559  $\text{mL min}^{-1}$  for cations and 0.33  $\text{mL min}^{-1}$  for anions and detected by  
560 a self-regenerating suppressor and a conductivity detector. Column  
561 temperature was maintained at 20.5 °C and the injection volume  
562 was 25  $\mu\text{L}$ . The cation eluent source was a Thermo Scientific Dionex  
563 EGC III Methanesulfonic acid eluent generator cartridge. Elution  
564 of cations was achieved with the following gradient: 12 mM to 20  
565 mM in 7 minutes, held at 20 mM for 8 minutes, ramped from 20  
566 mM to 40 mM in 3 minutes, the column was re-equilibrated at 12  
567 mM for 5 minutes. The anion eluent source was a Thermo Scientific  
568 Dionex EGC KOH cartridge. Elution of anions was achieved with  
569 the following concentration gradient: 6 mM to 21.5 mM in 16.5  
570 minutes, 21.5 to 60 mM in 6.5 minutes and held at 60 mM for 3  
571 minutes, the column was re-equilibrated at 6 mM for 8 minutes.  
572 Standards for the cations (Thermo Scientific Dionex Six Cation-II)  
573 and anions (Thermo Scientific Dionex Seven Anion Standard II)  
574 were used and the data were extracted using the Chromeleon 7.2  
575 SR4 software (Thermo Fisher Scientific, MA, USA).

576 Immediately after the final uptake assay sample collection, the  
577 roots were severed from the shoots and root respiration for each  
578 plant was measured. Roots were transferred into a 43 mL airtight  
579 chamber connected to the LI-8100 Automated Soil  $\text{CO}_2$  Flux System

(LI-COR Biosciences, NE, USA). The  $\text{CO}_2$  flux in the chamber was  
then measured with an observation duration of 90 seconds and dead  
band set at 20 seconds using the LI-8100A v4.0.9 software. Total  
respiration rate was calculated automatically by the linear fit mode  
in SoilFluxPro v4.0.1 software with a curve fit time of 20-90 seconds  
and 0.1 soil area. After root respiration, the root system was stored  
at 4 °C in 70% ethanol for later imaging using a flatbed scanner  
equipped with a transparency unit (Epson Expression 12000XL,  
Epson America Inc, CA, USA). Roots were spread out on a trans-  
parent Plexiglas tray with a 5-mm layer of water and imaged at  
a resolution of 600 dpi. The seminal, lateral and secondary-order  
lateral root lengths for each plant were calculated from the flatbed  
images using WinRhizo™ software 2013e (Regent Instruments Inc.,  
Canada) based on diameter thresholds (in mm) of 0.8-4.25, 0.15-  
0.8 and 0-0.15, respectively. The leaves were separated from the  
stems and laid out on a custom leaf vice made from two sheets of  
Perspex, and then imaged at a resolution of 300 dpi using a flatbed  
scanner equipped with a transparency unit. The leaf length and  
area for each plant was determined from the images using a custom  
imageJ macro (<https://doi.org/10.5281/zenodo.3893945>) modified  
from (50). The root system, leaves and stems were then dried at 60  
°C for 3 days for determination of dry weights.

For determination of root and leaf N contents, the root and leaf  
dry matter were ground into powder by placing the samples into  
glass vials with three opposing blades and shaking at a frequency  
of 30 Hz for 10 minutes using a Qiagen TissueLyser II (Qiagen,  
ML, USA). Ground root and leaf percent N was determined by  
the Dumas method using the Elementar rapid N exceed analyzer  
(Elementar Americas Inc, NY, USA). Samples were weighed into  
tin foil sample papers (Elementar Americas Inc, NY, USA) without  
any pre-treatment. Samples were run using a standard method  
implemented in the instrument software, with a total analysis time  
of about 5 minutes.  $\text{CO}_2$  was used as the carrier gas and L-aspartic  
acid (Sigma-Aldrich, St. Louis, MO, USA) was used as a standard.  
A nitrogen-to-protein content conversion factor of 6.25 was applied  
to calculate the average protein content (51). Rapid N Exceed  
software V.1.1.26 (Elementar Americas Inc, NY, USA) was used for  
data processing.

**Transcriptomic Analysis.** The entire root system was collected from  
maize seedlings grown in hydroponics. Seedlings were grown in full  
nutrient conditions for 12 days and then one half of the seedlings  
were macronutrient deprived for 48 h whilst the other half remained  
in full nutrient solution. The macronutrient deprivation was the  
same as used in the phenotyping experiment. Three biological  
replicates each consisting of 2-3 plants per line per treatment were  
collected. Samples were immediately frozen at 70 °C and later  
ground with a pestle and mortar under liquid nitrogen. Total  
RNA was extracted from the frozen tissues using Spectrum™ Plant  
Total RNA Kit (Sigma-Aldrich, St. Louis, MO, USA) following  
the manufacturer's instructions. RNA quality was checked with  
Agilent Bioanalyzer 2100 (Agilent, Palo Alto, CA, USA) and quan-  
tified using Qubit™ RNA BR Assay Kit (Thermo Fisher Scientific,  
MA, USA). One  $\mu\text{g}$  of DNase-treated total RNA was used for lib-  
rary construction using TruSeq Stranded mRNA Library Prep  
Kit (Illumina Inc, CA, USA) following the manufacturer's protocol.  
Library quality was checked using TapeStation (Agilent, Palo Alto,  
CA, USA) and quantified by Qubit™ RNA BR Assay Kit (Thermo  
Fisher Scientific, MA, USA). Each library was sequenced at 150 bp  
paired end at 30-40 million reads using an Illumina HiSeq sequencer  
(Novogene Co Ltd, Beijing, China).

The RNA-seq data set was mapped against the  
maize reference genome B73 RefGen V4 AGPv4  
(<https://maizegdb.org/genome/assembly/Zm-B73-REFERENCE-GRAMENE-4.0>) (52). Gene expression was quantified as Fragments  
Per Kilobase Of Exon Per Million Fragments Mapped (FPKM),  
and differentially expressed genes with a false discovery rate of  
less than 0.1 were accepted (53). Differential gene expression  
analysis was performed using DESeq2 with DEBrowser V1.17.1 by  
comparing gene expression of high specific nutrient uptake lines in  
low nutrient conditions to expression of genes in all other samples  
(53, 54). Genes with a maximum count of less than 10 across  
all samples were filtered out and the data was normalized using  
Median Ratio Normalization (MRN). Gene log fold-change was  
rounded to two decimal places and candidate genes were selected



654 based on a  $\pm 1$  log fold-change criterion with a P value less than  
 655 0.06. Gene ontology (GO) enrichment analysis was performed with  
 656 maize reference genome B73 RefGen V4 AGPv4 using Agrigo V2  
 657 (55). The expression changes of candidate genes were plotted using  
 658 Expression Heatmapper tool (56).

659 Primers used to amplify candidate macronutrient deprivation-  
 660 responsive gene transcripts were designed by determining the exon  
 661 regions for each gene using Gene Structure Display Server 2.0 (40)  
 662 and logged using Geneious software (Biomatters Ltd, Auckland, NZ).  
 663 Primers were designed using the last exon of each gene, avoiding  
 664 primers with predicted hairpins where possible, using Primer3 v4.0.0  
 665 software (57). Primer-BLAST was used to confirm the specificity  
 666 of primer pairs for the intended targets. Clustal omega (58) was  
 667 used to confirm that primers should bind to all splice variants of  
 668 gene transcripts. For subsequent reverse transcription-quantitative  
 669 PCR (RT-qPCR), 5  $\mu$ g of total RNA was treated with TURBO  
 670 DNA-free<sup>TM</sup>Kit (Invitrogen, Thermo Fisher Scientific, MA, USA)  
 671 to remove any potential genomic DNA contaminants. Two  $\mu$ g  
 672 of DNA-free total RNA was used for first-strand cDNA synthesis  
 673 using SuperScript<sup>TM</sup>III reverse transcriptase (Invitrogen, Thermo  
 674 Fisher Scientific, MA, USA). qRT-PCR was performed with KiCqS-  
 675 tart<sup>TM</sup>SYBR@Green qPCR ReadyMix<sup>TM</sup>(Sigma-Aldrich, St. Louis,  
 676 MO, USA) using QuantStudio<sup>TM</sup> 7 Flex Real-Time PCR System  
 677 (Applied Biosystems, Thermo Fisher Scientific, MA, USA). The  
 678 primer pairs used are listed in Table S3. Data were collected  
 679 and analyzed using the QuantStudio<sup>TM</sup>7 Flex Software (Applied  
 680 Biosystems, Thermo Fisher Scientific, MA, USA). Differential gene  
 681 expression was quantified based on the  $\Delta \Delta$ Ct method using normal-  
 682 ized geo-metric means of the two reference genes (Zm00001d002944,  
 683 Zm00001d020826; (59)).

684 **Statistical analysis.** Statistical analyses were conducted using R ver-  
 685 sion 3.6.0 (60); the statistical analysis R codes including the pack-  
 686 ages needed are available (<https://doi.org/10.5281/zenodo.3893945>).

687 The depletion rate of a nutrient from a solution is commonly  
 688 accepted as equal to the net uptake rate by roots (assuming both  
 689 influx and efflux). Therefore, the following equation was used to  
 690 determine the total net influx rates for nitrate, ammonium,  
 691 potassium, phosphate and sulfate:

$$692 \quad I_n = \frac{(C_t - C_0)}{(t_0 - t)} \quad [1]$$

693 where  $I_n$  is the net influx into the plant;  $C_0$  is the initial  
 694 concentration of the solution at the start of the experiment  $t_0$ ;  $C_t$   
 695 is the concentration at sampling time. The  $I_n$  was then divided by  
 696 either the root system length (cm) or weight (g) to calculate the  
 697 net specific nutrient uptake rate with the units  $\mu$ mol  $\text{cm}^{-1} \text{h}^{-1}$  or  
 698  $\mu$ mol  $\text{g}^{-1} \text{h}^{-1}$ . The 0 h and 1 h samples were processed for the low  
 699 nutrient treatment and the 0 h and 4 h samples were processed for  
 700 the high nutrient treatment as both of these provided a measurable  
 701 depletion rate for all macronutrients. The total root respiration  
 702 rate was divided by the total root length to give the specific root  
 703 respiration rate (nmol  $\text{CO}_2 \text{ m}^{-1} \text{ s}^{-1}$ ). The specific root length (cm  
 704  $\text{g}^{-1}$ ) was calculated by dividing the total root length by the root  
 705 dry weight. Broad-sense heritability ( $h^2$ ) was calculated using the  
 706 equation:

$$707 \quad h^2 = \frac{\sigma_g^2}{(\sigma_g^2 + \frac{\sigma_e^2}{r})} \quad [2]$$

708 where  $\sigma_g^2$  and  $\sigma_e^2$  are the genetic and residual variances, respec-  
 709 tively, and r is the number of experimental replications (61). Due to  
 710 missing samples from the seven individual replicate runs, we used  
 711 the average number of replications per line, which was 6.

712 **ACKNOWLEDGMENTS.** The authors would like to acknowl-  
 713 edge the USDA/National Institute of Food and Agriculture (Grant  
 714 reference 2017-67007-25948) and Noble Research Institute, LLC  
 715 for financial support. In addition, the authors would like to thank  
 716 Yuhong Tang, Guifeng Li, Nick Krom, Taegun Kwon, Levi Hartman,  
 717 Bonnie Watson and Michael Cloyde for technical assistance. YT  
 718 and GL assisted with RNA-sequencing, NK assisted with RNA-seq  
 719 analysis, TK assisted with qPCR, LH assisted with shoot imaging  
 720 and shoot grinding, MC for shoot and root grinding and BW for

operation of the Elemental Analyzer instrument for Dumas. The  
 authors thank Edison Blancaflor for reviewing the manuscript for  
 scientific soundness and providing helpful comments.

1. NK Fageria, *The Use of Nutrients in Crop Plants*. (2016). 724
2. MJ Hawkesford, An Overview of Nutrient Use Efficiency and Strategies for Crop Improvement  
in *The Molecular and Physiological Basis of Nutrient Use Efficiency in Crops*. (2011). 725
3. CS Wortmann, et al., Nitrogen use efficiency of irrigated corn for three cropping systems in  
Nebraska. *Agron. J.* **103**, 76–84 (2011). 726
4. SS Malhi, CA Grant, AM Johnston, KS Gill, Nitrogen fertilization management for no-till cereal  
production in the Canadian Great Plains: A review. *Soil Tillage Res.* **60**, 101–122 (2001). 727
5. B Hirel, J Le Gouis, B Ney, A Gallais, The challenge of improving nitrogen use efficiency in  
crop plants: Towards a more central role for genetic variability and quantitative genetics within  
integrated approaches. *J. Exp. Bot.* **58**, 2369–2387 (2007). 728
6. A Ferrante, FF Nocito, S Morgutti, GA Sacchi, Plant Breeding for Improving Nutrient Uptake  
and Utilization Efficiency. (Springer, Cham), pp. 221–246 (2017). 729
7. AH Fitter, TR Stickland, ML Harvey, GW Wilson, Architectural analysis of plant root systems  
1. Architectural correlates of exploitation efficiency. *New Phytol.* **118**, 375–382 (1991). 730
8. KL Nielsen, JP Lynch, AG JablOKow, PS Curtis, Carbon cost of root systems: an architectural  
approach. *Plant Soil* **165**, 161–169 (1994). 731
9. AL Oppelt, W Kurth, DL Godbold, Contrasting rooting patterns of some arid-zone fruit tree  
species from Botswana - II. Coarse root distribution. *Agrfor. Syst.* **64**, 13–24 (2005). 732
10. CN Topp, et al., 3D phenotyping and quantitative trait locus mapping identify core regions of  
the rice genome controlling root architecture. *Proc. Natl. Acad. Sci. United States Am.* **110**,  
E1695–E1704 (2013). 733
11. MP Pound, et al., Deep machine learning provides state-of-the-art performance in image-  
based plant phenotyping. *GigaScience* **6**, 1–10 (2017). 734
12. A Bucksch, et al., Image-based high-throughput field phenotyping of crop roots. *Plant Physiol.*  
**166**, 470–486 (2014). 735
13. D van Dusschoten, et al., Quantitative 3D analysis of plant roots growing in soil using mag-  
netic resonance imaging. *Plant Physiol.* **170**, 1176–1188 (2016). 736
14. R Rellán-Álvarez, et al., GLO-Roots: An imaging platform enabling multidimensional charac-  
terization of soil-grown root systems. *eLife* **4**, e07597 (2015). 737
15. A Seethepalli, et al., RhizoVision Crown: An Integrated Hardware and Software Platform for  
Root Crown Phenotyping. *Plant Phenomics* **2020**, 3074916 (2020). 738
16. EC Morris, et al., Shaping 3D Root System Architecture. *Curr. Biol.* **27**, PR919–R930 (2017). 739
17. NM Crawford, ADM Glass, Molecular and physiological aspects of nitrate uptake in plants.  
*Trends Plant Sci.* **3**, 389–395 (1998). 740
18. CH Ho, SH Lin, HC Hu, YF Tsay, CHL1 Functions as a Nitrate Sensor in Plants. *Cell* **138**,  
1184–1194 (2009). 741
19. HC Hu, YY Wang, YF Tsay, AtCIPK8, a CBL-interacting protein kinase, regulates the low-  
affinity phase of the primary nitrate response. *Plant J.* **57**, 264–278 (2009). 742
20. HSH Shin, HSH Shin, GR Dewbre, MJ Harrison, Phosphate transport in Arabidopsis: Pht1;1  
and Pht1;4 play a major role in phosphate acquisition from both low- and high-phosphate  
environments. *Plant J.* **39**, 629–642 (2004). 743
21. YJ Pyo, M Gierth, JI Schroeder, MH Cho, High-affinity k+ transport in arabidopsis: ATHAK5  
and AKT1 are vital for seedling establishment and postgermination growth under low-  
potassium conditions. *Plant Physiol.* **153**, 863–875 (2010). 744
22. E Epstein, DW Rains, OE Elizam, RESOLUTION OF DUAL MECHANISMS OF POTASSIUM  
ABSORPTION BY BARLEY ROOTS. *Proc. Natl. Acad. Sci.* **49**, 684–692 (1963). 745
23. M Siddiqi, A Glass, T Ruth, M Fernando, Studies of the regulation of nitrate influx by barley  
seedlings using 13NO31. *Plant Physiol.* **90**, 806–813 (1989). 746
24. TP Rao, et al., Kinetics of 15n-labelled nitrate uptake by maize (zea mays l.) root segments.  
*Soil Sci. Plant Nutr.* **43**, 491–498 (1997). 747
25. M Griffiths, L York, Targeting root ion uptake kinetics to increase plant productivity and nutrient  
use efficiency. *Plant Physiol.* **182**, 1854–1868 (2020). 748
26. VC Baligar, SA Barber, Genotypic Differences of Corn for Ion Uptake 1. *Agron. J.* **71**, 870–873  
(1979). 749
27. H Hasegawa, M Ichii, Variation in Michaelis-Menten kinetic parameters for nitrate uptake by  
the young seedlings in rice (*Oryza sativa* L.). *BREED.SCI.* **44**, 383–386 (1994). 750
28. GM Pace, PR McClure, Comparison of nitrate uptake kinetic parameters across maize inbred  
lines. *J. Plant Nutr.* **9**, 1095–1111 (1986). 751
29. DJ Hole, AM Emran, Y Fares, MC Drew, Induction of Nitrate Transport in Maize Roots, and  
Kinetics of Influx, Measured with Nitrogen-13. *Plant Physiol* **93**, 642–647 (1990). 752
30. RB Lee, MC Drew, Nitrogen-13 Studies of Nitrate Fluxes in Barley Roots II. EFFECT OF  
PLANT N-STATUS ON THE KINETIC PARAMETERS OF NITRATE INFLUX. *J. Exp. Bot.* **37**,  
1768–1779 (1986). 753
31. J Pang, SP Milroy, GJ Rebetzke, JA Palta, The influence of shoot and root size on nitrogen  
uptake in wheat is affected by nitrate affinity in the roots during early growth. *Funct. Plant  
Biol.* **42**, 1179–1189 (2015). 754
32. YH Teo, C Beyrouly, EE Gbur, Nitrogen, phosphorus, and potassium influx kinetic parameters  
of three rice cultivars. *J. Plant Nutr.* **15**, 435–444 (1992). 755
33. M Aslam, RL Travis, RC Huffaker, Comparative kinetics and reciprocal inhibition of nitrate and  
nitrite uptake in roots of uninduced and induced barley (*Hordeum vulgare* L) seedlings. *Plant  
Physiol.* **99**, 1124–1133 (1992). 756
34. ADM Glass, JE Shaff, LV Kochian, Studies of the Uptake of Nitrate in Barley: IV. Electrophys-  
iology. *Plant Physiol.* **99**, 456–463 (1992). 757
35. TV Venkatesh, et al., Metabolomic Assessment of Key Maize Resources: GC-MS and NMR  
Profiling of Grain from B73 Hybrids of the Nested Association Mapping (NAM) Founders and  
of Geographically Diverse Landraces. *J. Agric. Food Chem.* **64**, 2162–2172 (2016). 758
36. KH Liu, et al., Discovery of nitrate-CPK-NLP signalling in central nutrient-growth networks.  
*Nature* **545**, 311–316 (2017). 759
37. B Orman-Ligeza, et al., The Xerobranching Response Represses Lateral Root Formation  
When Roots Are Not in Contact with Water. *Curr. Biol.* **28**, 3165–3173.e5 (2018). 760

- 804 38. G Huang, et al., Rice actin binding protein RMD controls crown root angle in response to  
805 external phosphate. *Nat. Commun.* **9**, 2346 (2018).
- 806 39. LM York, M Silberbush, JP Lynch, Spatiotemporal variation of nitrate uptake kinetics within  
807 the maize (*Zea mays* L.) root system is associated with greater nitrate uptake and interactions  
808 with architectural phenes. *J. experimental botany* **67**, 3763–3775 (2016).
- 809 40. B Hu, et al., Variation in NRT1.1B contributes to nitrate-use divergence between rice sub-  
810 species. *Nat. Genet.* **47**, 834–838 (2015).
- 811 41. D Davidi, et al., Highly active rubiscos discovered by systematic interrogation of natural se-  
812 quence diversity. *The EMBO J.*, e104081 (2020).
- 813 42. MM Aziz, JA Palta, KH Siddique, VO Sadras, Five decades of selection for yield reduced root  
814 length density and increased nitrogen uptake per unit root length in Australian wheat varieties.  
815 *Plant Soil* **413**, 181–192 (2017).
- 816 43. G Krouk, et al., Nitrate-regulated auxin transport by NRT1.1 defines a mechanism for nutrient  
817 sensing in plants. *Dev. Cell* **18**, 927–937 (2010).
- 818 44. A Medici, et al., Identification of molecular integrators shows that nitrogen actively controls  
819 the phosphate starvation response in plants. *Plant Cell* **31**, 1171–1184 (2019).
- 820 45. D Houle, DR Govindaraju, S Omholt, Phenomics: The next challenge. *Nat. Rev. Genet.* **11**,  
821 885–866 (2010).
- 822 46. C Zhao, et al., Crop Phenomics: Current Status and Perspectives. *Front. Plant Sci.* **10**, 714  
823 (2019).
- 824 47. LM York, Functional phenomics: An emerging field integrating high-throughput phenotyping,  
825 physiology, and bioinformatics. *J. Exp. Bot.* **70**, 379–386 (2019).
- 826 48. JP Lynch, Root phenes that reduce the metabolic costs of soil exploration: Opportunities for  
827 21st century agriculture. *Plant, Cell Environ.* **38**, 1775–1784 (2015).
- 828 49. HM Schneider, JA Postma, T Wojciechowski, C Kuppe, JP Lynch, Root cortical senescence  
829 improves growth under suboptimal availability of N, P, and K. *Plant Physiol.* **174**, 2333–2347  
830 (2017).
- 831 50. M Griffiths, et al., Identification of nitrogen-dependent QTL and underlying genes for root  
832 system architecture in hexaploid wheat. *bioRxiv* (2019).
- 833 51. F Mariotti, D Tomé, PP Mirand, Converting nitrogen into protein - Beyond 6.25 and Jones'  
834 factors. *Critical Rev. Food Sci. Nutr.* **48**, 177–184 (2008).
- 835 52. Y Jiao, et al., Improved maize reference genome with single-molecule technologies. *Nature*  
836 **546**, 524–527 (2017).
- 837 53. MI Love, W Huber, S Anders, Moderated estimation of fold change and dispersion for RNA-  
838 seq data with DESeq2. *Genome Biol.* **15** (2014).
- 839 54. A Kucukural, O Yukselen, DM Ozata, MJ Moore, M Garber, DEBrowser: interactive differential  
840 expression analysis and visualization tool for count data. *BMC Genomics* **20** (2019).
- 841 55. T Tian, et al., AgriGO v2.0: A GO analysis toolkit for the agricultural community, 2017 update.  
842 *Nucleic Acids Res.* **45**, W122–W129 (2017).
- 843 56. S Babicki, et al., Heatmapper: web-enabled heat mapping for all. *Nucleic acids research* **44**,  
844 W147–W153 (2016).
- 845 57. A Untergasser, et al., Primer3-new capabilities and interfaces. *Nucleic Acids Res.* **40**, 1–12  
846 (2012).
- 847 58. F Madeira, et al., The EMBL-EBI search and sequence analysis tools APIs in 2019. *Nucleic*  
848 *Acids Res.* **47**, W636–W641 (2019).
- 849 59. F Lin, et al., Genome-wide identification of housekeeping genes in maize. *Plant Mol. Biol.* **86**,  
850 543–554 (2014).
- 851 60. R Development Core Team 3.0.1., A Language and Environment for Statistical Computing. *R*  
852 *Foundation for Stat. Comput.* (2013).
- 853 61. DS Falconer, TFC Mackay, *Introduction to Quantitative Genetics (Fourth Edition)*. (1996).
